# Supplementary material
Source: Elsevier journal article supplement (https://www.sciencedirect.com/science/article/pii/S0213911119300354)
Supplement: mmc1 [file S0213911119300354:mmc1.docx]

**Apéndice**

**Figura I.** Adaptación del modelo EVPA de gestión del impacto para el PAP&PD.

**
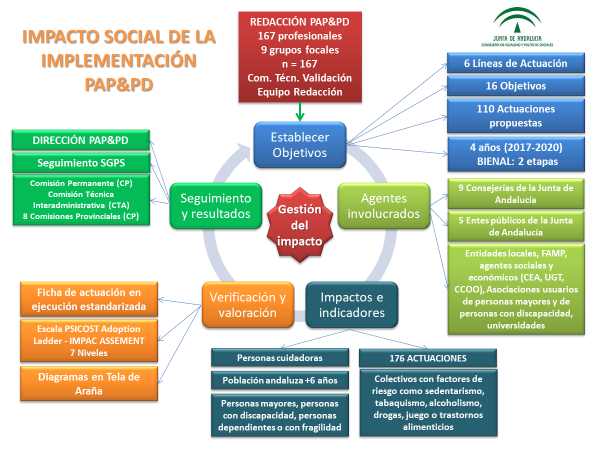
**

**Figura II.** Procedimiento seguido para la evaluación del impacto de las actuaciones en ejecución en el año 2017 del PAP&PD**.**

**
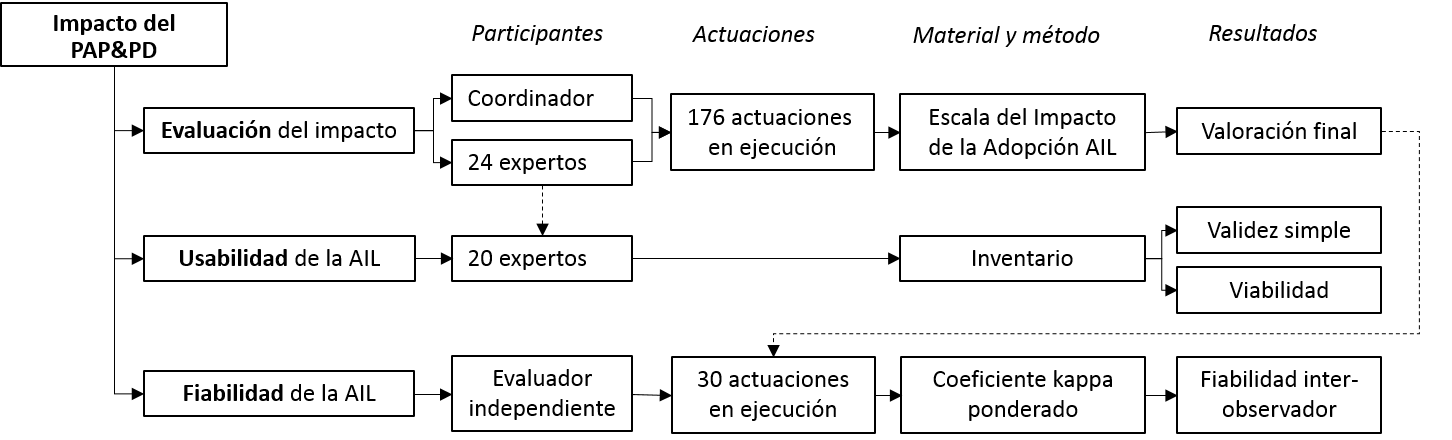
**

**Tabla I**

Definiciones, seis líneas prioritarias y 16 objetivos del PAP&PD

| **Definiciones** |
| --- |
| - *Línea del plan (P):*Son las líneas prioritarias de actuación del PAP&PD que engloban varios objetivos para su implementación y seguimiento. - *Actuaciones propuestas:*Son los programas, actividades, acciones, hecho o conjunto de hechos constatables que son propuestos por los grupos focales de redacción del PAP&PD. - *Actuaciones en ejecución:*Son los programas, actividades, acciones, hecho o conjunto de hechos constatables que son desarrollados o puestos en marcha por una de las entidades que participan activamente en el Plan, en un período concreto. |
| **Líneas y objetivos** |
| *Línea 1. Promoción de la autonomía*   - Objetivo 1.1. Promover las condiciones y apoyos necesarios para hacer efectiva la autonomía personal. - Objetivo 1.2.Promocionar estilos de vida saludables en todos los ámbitos de la vida.   *Línea 2. Prevención de la dependencia*   - Objetivo 2.1. Prevención primaria: desarrollar medidas dirigidas a personas que no se encuentran en situación de dependencia, con el objetivo de evitar o retrasar la aparición de esta. - Objetivo 2.2. Prevención secundaria: intervenir sobre la situación de dependencia de manera precoz, cuando todavía existen posibilidades de reversión o modificación de su curso y, por tanto, de mejorar su pronóstico o impedir su empeoramiento.   *Línea 3. Reducción del impacto*   - Objetivo 3.1. Prevención terciaria: desarrollar medidas que traten de reducir en lo posible los niveles de dependencia y de minimizar sus repercusiones sobre la funcionalidad social de las personas y su calidad de vida. - Objetivo 3.2. Fomentar que los entornos, procesos, bienes y servicios estén concebidos conforme a los criterios de accesibilidad universal y diseño para todas las personas. - Objetivo 3.3. Favorecer la mejora continua de la calidad en los servicios. - Objetivo 3.4. Facilitar que, tanto las personas en situación de dependencia como quienes le cuidan, puedan acceder a los sistemas públicos de servicios sociales y sanitarios. - Objetivo 3.5. Fomentar la autonomía personal y la participación activa en la comunidad de las mujeres con discapacidad o dependencia, así como de las personas que cuidan.   *Línea 4. Intersectorialidad y participación*   - Objetivo 4.1. Establecer un marco normativo de coordinación para garantizar una atención integral y centrada en la persona que contribuya a la optimización y sostenibilidad de los recursos públicos. - Objetivo 4.2. Promover el trabajo intersectorial entre los servicios sociales, sanitarios, educativos, laborales, de vivienda, promoción de las tecnologías de la información y la comunicación y de investigación. - Objetivo 4.3. Promover la participación de las personas con discapacidad, personas mayores y personas en situación de dependencia, así como de las asociaciones y empresas prestadoras de servicios.   *Línea 5. Formación y sensibilización*   - Objetivo 5.1. Promover acciones de sensibilización y difusión a la ciudadanía de los recursos para la promoción de la autonomía y prevención de la dependencia. - Objetivo 5.2. Promover la formación de todas las personas trabajadoras y agentes implicados con la finalidad de desarrollar las competencias necesarias.   *Línea 6. Investigación e innovación*   - Objetivo 6.1. Desarrollar iniciativas de investigación sobre promoción de la autonomía personal y prevención de las situaciones de dependencia. - Objetivo 6.2. Impulsar el desarrollo y la aplicación de productos, servicios y contenidos tecnológicos que favorezcan la autonomía personal y la prevención de la dependencia. |

**Tabla II**

Ficha estandarizada de seguimiento de actuaciones en ejecución

| FICHA nº: |  |
| --- | --- |
| ENTIDAD |  |
| NOMBRE DE LA ACTIVIDAD |  |
| LÍNEA DE ACCIÓN Y OBJETIVO |  |
| ENTIDAD LEADER DE LA ACCIÓN |  |
| FECHA INICIO |  |
| FECHA FINALIZACIÓN |  |
| ENTIDAD RESPONSABLE |  |
| DESCRIPCIÓN DE LA ACTIVIDAD (sin límite de texto) |  |
| SEGUIMIENTO (INDICADORES) |  |
| EVIDENCIAS, PUBLICACIÓN, DIFUSIÓN, MEDIOS AV, ETC. |  |
| ENTIDADES COLABORADORAS EN LA EJECUCIÓN (públicas y privadas) |  |
| IMPACTO DE LA IMPLEMENTACIÓN |  |
| FINANCIACIÓN Y GASTO EJECUTADO |  |
| OBSERVACIONES |  |

**Tabla III**

Evaluación interexaminadores de 30 fichas de actuaciones seleccionadas aleatoriamente entre las 176 actuaciones en ejecución y resultado del cálculo del coeficiente kappa ponderado con pesos cuadráticos

| Nº ficha | Nombre de la ficha | | | | | Eval. Téc. Exp. | | Eval. Ext. |
| --- | --- | --- | --- | --- | --- | --- | --- | --- |
| ASSDA 1.1.1.2. | Publicación del crédito presupuestario anual disponible para la financiación de los servicios de promoción de la autonomía personal. | | | | | 7 | | 5 |
| ASSDA 1.1.13 | Campañas teleasistencia | | | | | 7 | | 7 |
| ASSDA 3.1.2.1. | Actuaciones mantenimiento funcional y cognitivo UED | | | | | 6 | | 7 |
| ASSDA 3.3.5. | Encuestas de satisfacción | | | | | 7 | | 7 |
| ASSDA 5.1.1. | Acciones de información y sensibilización sobre promoción de la autonomía personal, y la prevención de la dependencia y otras desigualdades | | | | | 2 | | 7 |
| SGSS-ASSDA 6.2.1.3. | Mapa informatizado de servicios sociales de Andalucía v2 | | | | | 7 | | 7 |
| CCULTURA 1.1.15.2 | Visitas guiadas al conjunto arqueológico de Baelo Claudia (Tarifa). | | | | | 7 | | 7 |
| CCULTURA 4.2.13.6. | Exposición «Hoy toca el Prado» | | | | | 7 | | 7 |
| CEDUC 4.2.11.1.2. | Programas específicos de formación profesional básica | | | | | 6 | | 7 |
| CEEC 4.2.10.1. | Programas de prevención de accidentes de trabajo y enfermedades profesionales | | | | | 6 | | 7 |
| CEEC 4.2.10.3.3 | Concesión subvenciones públicas por parte del servicio andaluz de empleo dirigidas a personas con discapacidad en régimen de concurrencia competitiva y no competitiva.  (Órdenes de 7 de febrero de 2017, BOJA nº 27 9/2/2017) | | | | | 7 | | 7 |
| CJI 4.3.8.1. | Fomento de la participación de las Agrupaciones Locales del Voluntariado de Protección Civil en el diseño y desarrollo de las actividades de promoción de la autonomía personal que, por su naturaleza, requieran la colaboración del voluntariado de protección civil, siempre en situaciones de emergencias | | | | | 6 | | 7 |
| CS1.1.2-1 | Técnicas de autocuidado PM y PD | | | | | 3 | | 4 |
| CS1.2.1-5 | Desarrollo de la PDEAS: Plataforma de Envejecimiento Activo y Saludable | | | | | 3 | | 4 |
| CS1.2.2-1 | Desarrollo del Programa Salud 65 +: (diseño de la Escuela de Envejecimiento Activo y Saludable). | | | | | 4 | | 3 |
| CS2.1.1-1 | Factores de riesgo en el ámbito local por malos hábitos – SALUD 65+ | | | | | 4 | | 4 |
| CS2.2.2-2 | Protocolos de prevención de la dependencia – SALUD | | | | | 4 | | 4 |
| CS 2.2.3-4. | Desarrollo de servicios y prestaciones, basado en la evidencia, que apoyen el mantenimiento de la capacidad funcional/cognitiva de las personas en situación de dependencia, en su entorno inmediato | | | | | 3 | | 3 |
| CS3.1.10-1 | Desarrollo del Servicio Enfermera Gestora de casos y TS en el ámbito hospitalario para detectar en los servicios de urgencias de los hospitales a pacientes en riesgo social y en situación de dependencia para garantizar la continuidad de atención social (Nº de activaciones del protocolo de actuación ante pacientes en riesgo social y en situación de dependencia a través de la EGC y/o la TS hospitalaria) | | | | | 6 | | 7 |
| DGPD 1.2.3. | Programas de grupos de autogestores con personas con discapacidad intelectual | | | | | 7 | | 7 |
| DGPD 4.2.11. | Programas educativos que favorezcan el derecho a disfrutar de un ocio inclusivo y actividades deportivas adaptadas a personas en situación de dependencia | | | | | 7 | | 7 |
| CTURDEP 1.2.10 | Concesión de ayudas a través de la línea de subvenciones de Fomento de Clubes Deportivos, dirigida a los clubes deportivos andaluces para su participación en competiciones oficiales para las categorías de deporte en edad escolar (desde los 6 hasta los 18 años) | | | | | 7 | | 4 |
| CTURDEP 3.2.11. | Mejora de la accesibilidad universal en los Municipios Turísticos de Andalucía | | | | | 5 | | 7 |
| FAISEM 2.1.2.4. | Formación permanente de profesionales de Programa Residencial y Programa de Soporte Diurno (PSD) en hábitos saludables de las personas usuarias de los dispositivos. | | | | | 7 | | 7 |
| FAISEM 3.1.1.2. | Acceso a Programa Residencial Casa Hogar – Vivienda Supervisada | | | | | 7 | | 7 |
| FAISEM 3.2.4.5. | Inclusión de información sobre enfermedad mental, aspectos legales, lucha contra el estigma en redes sociales y web | | | | | 7 | | 6 |
| DGPM3.1.8. | Desarrollo de estancias temporales en servicios residenciales | | | | | 6 | | 7 |
| DGPM 5.1.3. | Acciones de formación a personas mayores / con discapacidad en el uso de dispositivos móviles y aplicaciones dirigidas a ellos | | | | | 6 | | 7 |
| DGPM 5.2.2. | Diseño, desarrollo y evaluación de los itinerarios de formación que garanticen el desarrollo de las competencias profesionales | | | | | 7 | | 7 |
| ANÁLISIS DE FIABILIDAD | | | | | | | | |
| Ponderado por pesos cuadráticos | Kappa | Error típico asintótico | Z | p | Límite inferior del IC asintótico 95% | | Límite superior del IC asintótico 95% | |
|  | ,721 | ,110 | 3,927 | ,000 | ,505 | | ,936 | |

**INVENTARIO**

**Evaluación de la herramienta** ***Adoption Impact Ladder* – AIL**

Estudio sobre la viabilidad de la herramienta *Adoption Impact Ladder* – AIL para evaluación de políticas públicas

**Inventario sobre herramientas de evaluación de políticas públicas**

| **Nombre:** |  |
| --- | --- |

| **Cargo:** |  |
| --- | --- |

**Grupo experto:** *Marcar con una ‘X’*

| Cultura, Turismo y Deporte |  |
| --- | --- |
| Educación |  |
| Empleo, Empresa y Comercio |  |
| Fomento y Vivienda |  |
| Hacienda y Administración Pública |  |
| Igualdad y Políticas Sociales |  |
| Justicia e Interior |  |
| Salud |  |
| ASSDA |  |
| IAAP |  |
| FAISEM |  |
| ESPA |  |

| **Años de experiencia:** |  |
| --- | --- |

La información extraída de este inventario podría ser usada en publicaciones. Serás identificado en la publicación y se te podría solicitar que revisases la información antes de la publicación final.

Si tuvieras alguna pregunta sobre el inventario contacta con:

- Federico Alonso Trujillo, Agencia de Servicios Sociales y Dependencia de Andalucía: [federico.alonso@juntadeandalucia.es](mailto:federico.alonso@juntadeandalucia.es)
- José Alberto Salinas Pérez, Universidad Loyola Andalucía: [jsalinas@uloyola.es](mailto:jsalinas@uloyola.es)

**Glosario de conceptos:**

***Adoption Impact Ladder –* AIL**

Es una herramienta creada específicamente para la evaluación de políticas públicas. La herramienta clasifica el estado de desarrollo de cualquier tipo de política y muestra los resultados de una forma intuitiva a gestores y decisores públicos.

***Relevancia***

Los resultados obtenidos al utilizar la herramienta son relevantes para la toma de decisiones en políticas públicas.

***Utilidad***

La herramienta permite completar un conjunto de tareas y lograr metas específicas para la evaluación de políticas públicas. La información presentada es útil para analizar la situación de desarrollo de las políticas y apoyar la toma de decisiones.

***Eficiencia***

La herramienta produce los resultados esperados y su uso no es complejo.

***Efectividad***

La herramienta facilita los procesos y los resultados deseados permitiendo extraer conclusiones sobre el estado de desarrollo de las políticas públicas. La herramienta cumple con las necesidades específicas de un gestor público y produce información correcta en términos de cantidad y calidad.

***Novedad***

Usar la herramienta para el análisis de políticas públicas es una experiencia nueva, diferentes y de interés.

***Potencial***

La herramienta motiva a profundizar en la evaluación de políticas públicas. La herramienta es recomendable a otros colegas.

**Evaluación de los sistemas tradicionales de evaluación de políticas públicas**

**Por favor indica en cada pregunta cómo valoras las herramientas tradicionales para la evaluación de políticas públicas. Marca con una ‘X’ y da una puntuación (0-10) para cada pregunta.**

**Pregunta:** ¿Has usado previamente otras herramientas para la evaluación de políticas públicas? Si es así, ¿cómo valorarías los siguientes criterios de evaluación para las mismas?

| **1.** | La **relevancia** práctica de usar herramientas tradicionales de evaluación de políticas públicas. | **Bajo** | **Medio-Bajo** | **Medio** | **Medio-Alto** | **Alto** |
| --- | --- | --- | --- | --- | --- | --- |
|  |  |  |  |  |
| Puntuación: 0 (muy baja) - 10 (muy alta) |  | | | | |
| **2.** | La **utilidad** práctica de usar herramientas tradicionales de evaluación de políticas públicas*.* | **Bajo** | **Medio-Bajo** | **Medio** | **Medio-Alto** | **Alto** |
|  |  |  |  |  |
| Puntuación: 0 (muy baja) - 10 (muy alta) |  | | | | |
| **3.** | La **eficiencia** práctica de usar herramientas tradicionales de evaluación de políticas públicas. | **Bajo** | **Medio-Bajo** | **Medio** | **Medio-Alto** | **Alto** |
|  |  |  |  |  |
| Puntuación: 0 (muy baja) - 10 (muy alta) |  | | | | |
| **4.** | La **efectividad** práctica de usar herramientas tradicionales de evaluación de políticas públicas. | **Bajo** | **Medio-Bajo** | **Medio** | **Medio-Alto** | **Alto** |
|  |  |  |  |  |
| Puntuación: 0 (muy baja) - 10 (muy alta) |  | | | | |

**Evaluación de la herramienta *Adoption Impact Ladder* – AIL**

**Por favor, indica cómo valoras la herramienta *Adoption Impact Ladder* – AIL para la evaluación de políticas públicas utilizando la escala. Marca con una ‘X’ y da una puntuación (0-10) para cada pregunta.**

**Pregunta:** ¿Cómo valoras los siguientes criterios de evaluación para la herramienta *Adoption Impact Ladder* – AIL para la evaluación de políticas públicas?

| **1.** | La **relevancia** práctica de utilizar la herramienta IAL. | **Bajo** | **Medio-Bajo** | **Medio** | **Medio-Alto** | **Alto** |
| --- | --- | --- | --- | --- | --- | --- |
|  |  |  |  |  |
|  | Puntuación: 0 (muy baja) - 10 (muy alta) |  | | | | |
| **2.** | La **utilidad** práctica de utilizar la herramienta IAL. | **Bajo** | **Medio-Bajo** | **Medio** | **Medio-Alto** | **Alto** |
|  |  |  |  |  |
| Puntuación: 0 (muy baja) - 10 (muy alta) |  | | | | |
| **3.** | La **eficiencia** práctica de utilizar la herramienta IAL. | **Bajo** | **Medio-Bajo** | **Medio** | **Medio-Alto** | **Alto** |
|  |  |  |  |  |
| Puntuación: 0 (muy baja) - 10 (muy alta) |  | | | | |
| **4.** | La **efectividad** práctica de utilizar la herramienta IAL. | **Bajo** | **Medio-Bajo** | **Medio** | **Medio-Alto** | **Alto** |
|  |  |  |  |  |
| Puntuación: 0 (muy baja) - 10 (muy alta) |  | | | | |
| **5.** | La **novedad** de la herramienta IAL. | **Bajo** | **Medio-Bajo** | **Medio** | **Medio-Alto** | **Alto** |
|  |  |  |  |  |
| Puntuación: 0 (muy baja) - 10 (muy alta) |  | | | | |
| **6.** | La **potencialidad** de utilizar la herramienta IAL.  The practical ***potentiality***of using *SOMNet model* | **Bajo** | **Medio-Bajo** | **Medio** | **Medio-Alto** | **Alto** |
|  |  |  |  |  |
| Puntuación: 0 (muy baja) - 10 (muy alta) |  | | | | |
| **7.** | ¿Tienes algún comentario o sugerencia sobre la herramienta IAL? |  | | | | |
